# Supplementary material
Source: Springer Nature journal article supplement (https://www.springermedizin.de/resource/supplementary/12874_2011_583_MOESM4_ESM.pdf/9432562)

**BMI and Ages**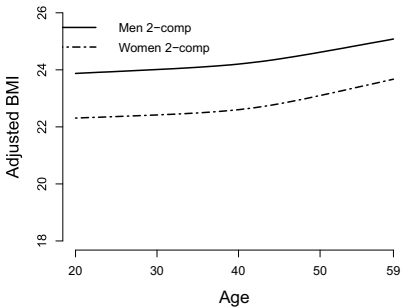**BMI and Birth Year**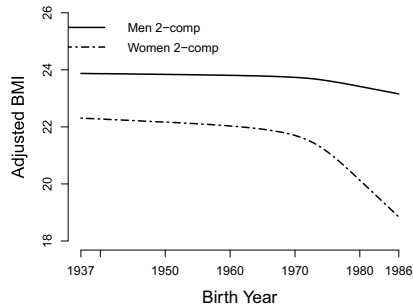**TG and Ages**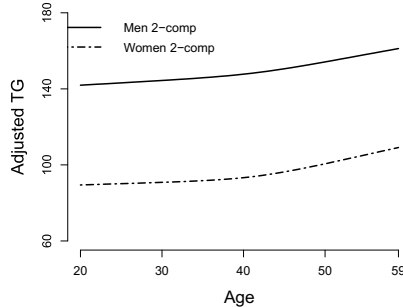**TG and Birth Year**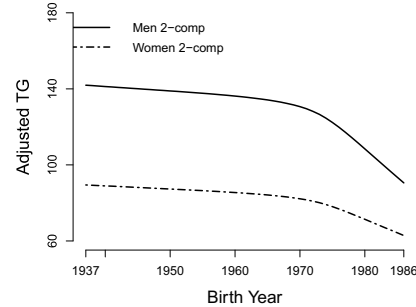**SBP and Ages**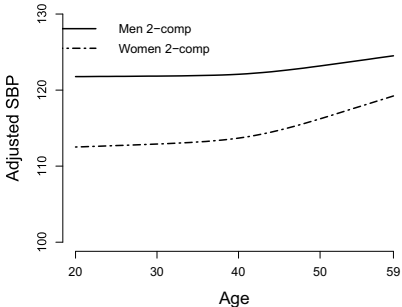**SBP and Birth Year**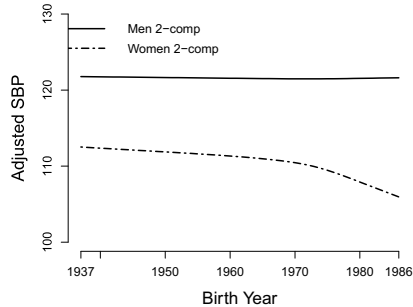**HDL and Ages**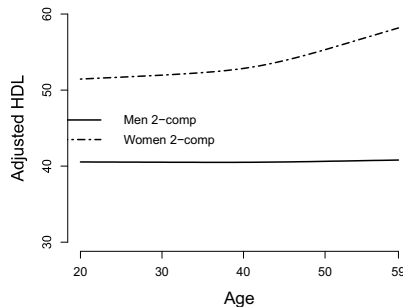**HDL and Birth Year**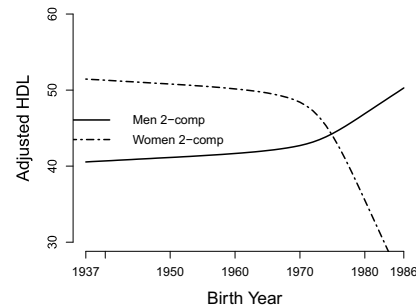**DBP and Ages**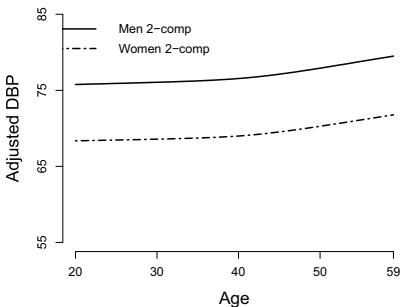**DBP and Birth Year**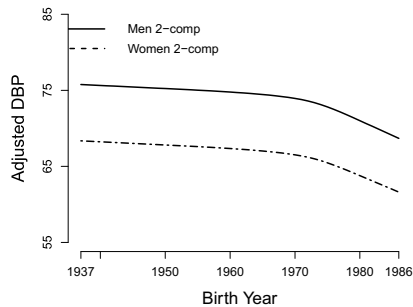**LDL and Ages**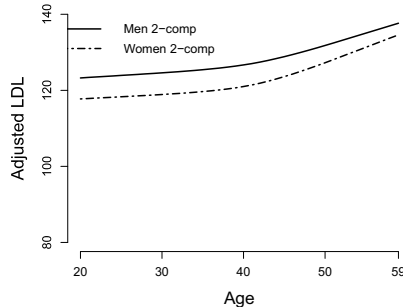**LDL and Birth Year**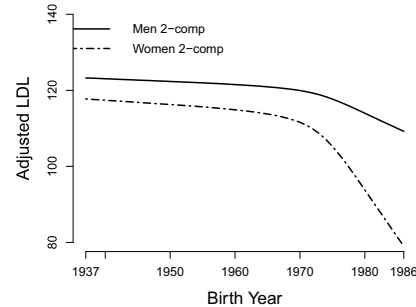**FPG and Ages**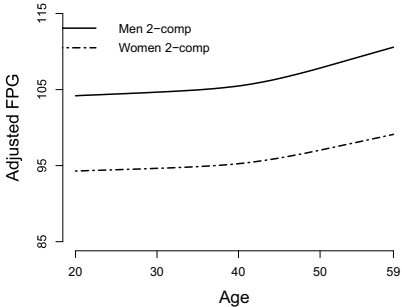**FPG and Birth Year**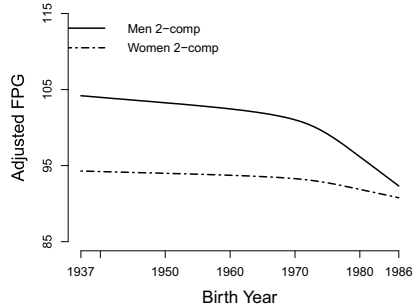**UA and Ages**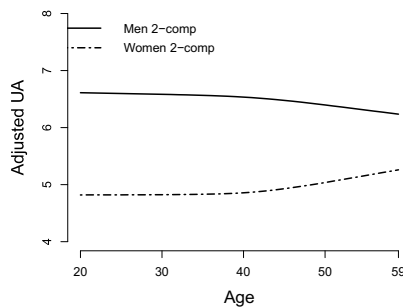**UA and Birth Year**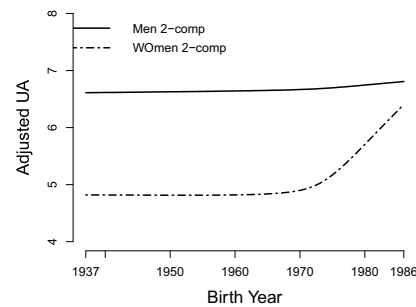

Supplement: MOESM4 [file 9432562]
